# Supplementary material for: Assessing the potential of exposure to endocrine disrupting chemicals through greywater reuse practices in Ghana: a scoping review
Source: Royal Society of Chemistry journal article supplement (doi:10.1039/d5ew00749f), 2026-01-01
Supplement: d5ew00749f1.pdf [file d5ew00749f1.pdf]

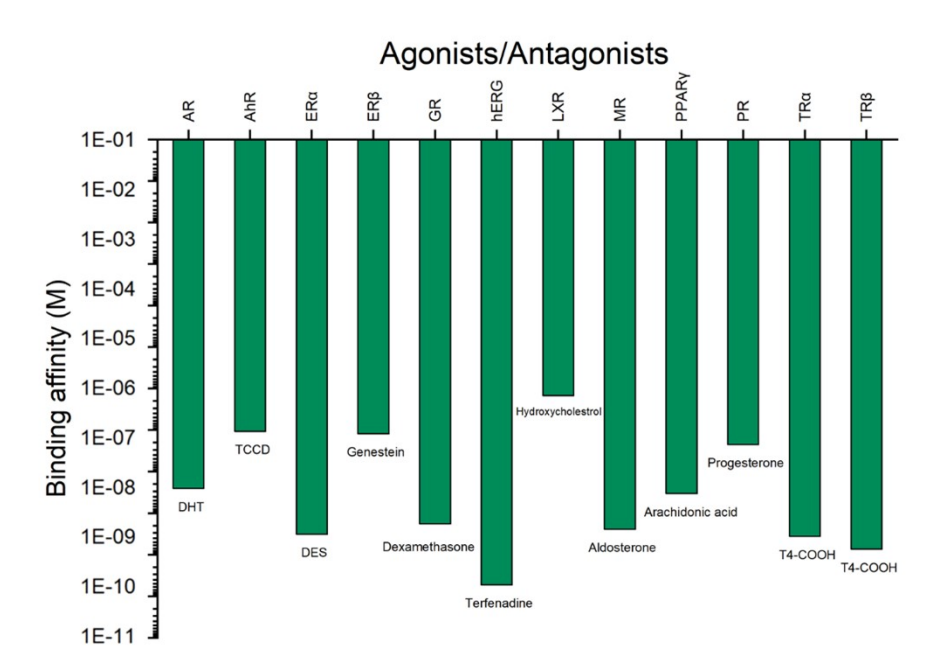

Figure S1- Binding affinity of well-known agonists/antagonists of the 12 receptors as modeled in VTL

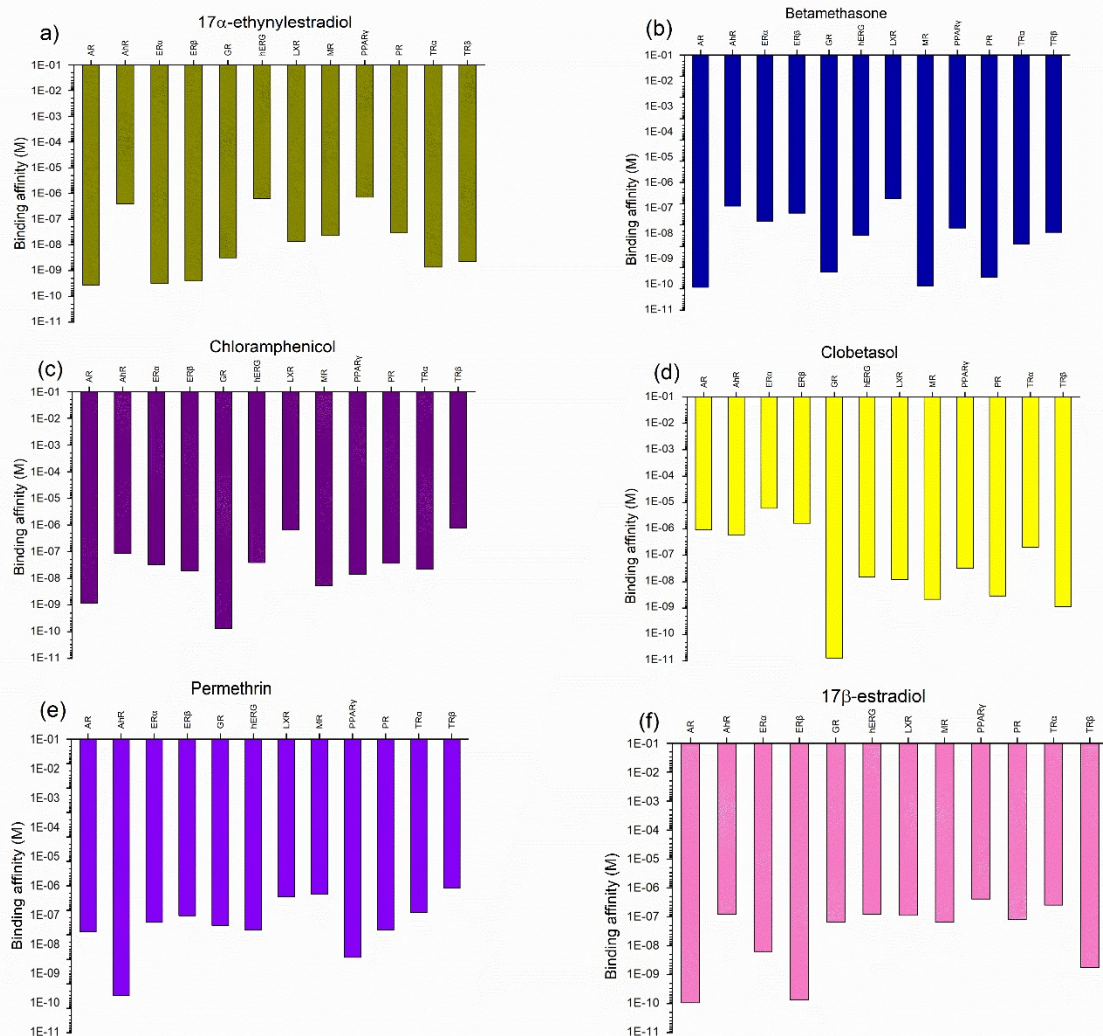

Figure S2- Binding of pollutants with predicted high to very high toxicity to 12 nuclear receptors. a) 17 $\alpha$ -ethynlestradiol, b) betamethasone, c) chloramphenicol, d) clobetasol, e) permethrin, f) 17 $\beta$ -estradiol
